# Supplementary material
Source: PubMed Central journal article supplement (PMC5993945)
Supplement: mmc1.pdf [file mmc1.pdf]

**YMTHE, Volume 26**

**Supplemental Information**

**Chemically Modified Cpf1-CRISPR RNAs Mediate  
Efficient Genome Editing in Mammalian Cells**

**Moira A. McMahon, Thazha P. Prakash, Don W. Cleveland, C. Frank  
Bennett, and Meghdad Rahdar**

# Supplementary Figure S1

A

| Cpf1 Direct Repeat  | DNMT1 (genomic target)  | gBlock      | Direct Repeat Length | Target Length | Total RNA Length | Fold Change |
|---------------------|-------------------------|-------------|----------------------|---------------|------------------|-------------|
| taatttctactctttagat | CTGATGGTCCATGTCTGTTACTC | FL-43-01    | 20                   | 23            | 43               | 1           |
| ttctactctttagat     | CTGATGGTCCATGTCTGTTACTC | Trunc-39-01 | 16                   | 23            | 39               | nd          |
| taatttctactctttagat | CTGATGGTCCATGTCTGTTA    | Trunc-40-02 | 20                   | 20            | 40               | 1           |
| ttctactctttagat     | CTGATGGTCCATGTCTGT      | Trunc-34-01 | 16                   | 18            | 34               | nd          |
| taatttctactctttagat | CTGATGGTCCATGTCTGT      | Trunc-38-01 | 20                   | 18            | 38               | 0.7         |
| ttctactctttagat     | CTGATGGTCCATGTCTGTTA    | Trunc-36-02 | 16                   | 20            | 36               | nd          |

B

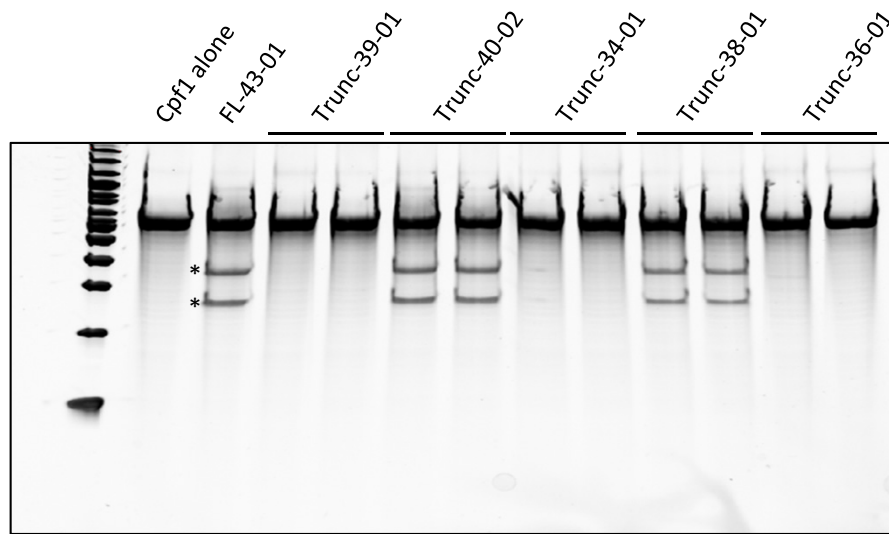

\*Expected bands

**Supplementary Figure S1.** crRNAs with a 16 nucleotide direct repeat are not active. (A) Complete sequence and activity of truncated crRNAs targeting DNMT1. No data (nd) was observed for Trunc-39-01, Trunc-34-01 and Trunc-36-01. (B) Surveyor nuclease assay gel with expected bands indicated by an asterisk (\*). Duplicate lanes represent biological replicates.

# Supplementary Figure S2

A

| Name    | crRNA sequence (5' to 3')                                          | % Gene Disruption (Absolute) |
|---------|--------------------------------------------------------------------|------------------------------|
| D-45-01 | CTUAAUUUCUACUCUUGUAGAU <u>CUGAUGG</u> UCCAUGUCUGU <u>TACTC</u>     | 21                           |
| D-43-11 | UAAUUUCUACUCUUGUAGAU <u>CUGAUGG</u> UCCAUGUC <u>TGTTACTC</u>       | nd                           |
| D-43-12 | UAAUUUCUACUCUUGUAGAU <u>CUGAUGG</u> UCCAUGUC <u>CATGTCTGTTACTC</u> | nd                           |
| D-43-13 | UAAUUUCUACUCUUGUAGAU <u>CUGAUGG</u> TCCATGTCTGTTACTC               | nd                           |
| D-43-14 | UAAUUUCUACUCUUGUAGAU <u>CUGAUGG</u> TCCATGTCTGTTACTC               | nd                           |
| D-43-15 | UAAUUUCUACUCUUGUAGAU <u>CTGATGG</u> TCCATGTCTGTTACTC               | nd                           |
| D-43-16 | TAATTTCTACTCTTGTAGAT <u>CTGATGG</u> TCCATGTCTGTTACTC               | nd                           |

← Direct Repeat →
← DNA Specificity →
DNA

B

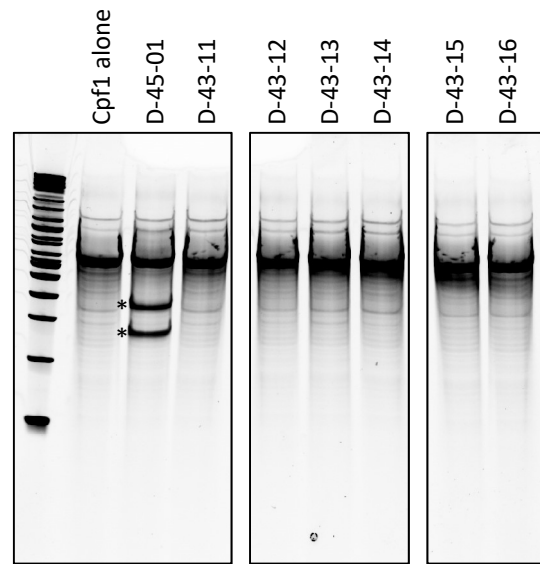

\*Expected bands

**Supplementary Figure S2.** scrRNAs with increasing DNA substitutions are not active. (A) Complete sequence and activity of DNA substituted scrRNAs targeting DNMT1. No data (nd) was observed for scrRNAs with eight or more DNA substitutions in the DNA specificity region. (B) Representative surveyor nuclease assay gel with expected bands indicated by an asterisk (\*).

# Supplementary Figure S3

A

| Name      | crRNA sequence (5' to 3')                                                                        | Fold Change (Normalized) |
|-----------|--------------------------------------------------------------------------------------------------|--------------------------|
| MPF-40-04 | C <sub>5</sub> U <sub>5</sub> UAAUUCUACUCUUGUAGAUCUGAUGGUCCAUGUCU <sub>5</sub> G <sub>5</sub> U  | 0.4                      |
| MPF-40-05 | C <sub>5</sub> U <sub>5</sub> JAAUUUCUACUCUUGUAGAUCUGAUGGUCCAUGUCU <sub>5</sub> G <sub>5</sub> U | 0.3                      |
| MPF40-06  | C <sub>5</sub> U <sub>5</sub> UAAUUUCUACUCUUGUAGAUCUGAUGGUCCAUGUCU <sub>5</sub> G <sub>5</sub> U | 0.4                      |
| MPF-40-07 | C <sub>5</sub> U <sub>5</sub> JAAUUUCUACUCUUGUAGAUCUGAUGGUCCAUGUCU <sub>5</sub> G <sub>5</sub> U | 0.3                      |
| MPF-40-08 | C <sub>5</sub> U <sub>5</sub> UAAUUUCUACUCUUGUAGAUCUGAUGGUCCAUGUCU <sub>5</sub> G <sub>5</sub> U | 0.3                      |
| MPF-40-09 | C <sub>5</sub> U <sub>5</sub> JAAUUUCUACUCUUGUAGAUCUGAUGGUCCAUGUCU <sub>5</sub> G <sub>5</sub> U | nd                       |

← Direct Repeat →
← DNA Specificity →
2'-OMe, PS, 2'-F, cET

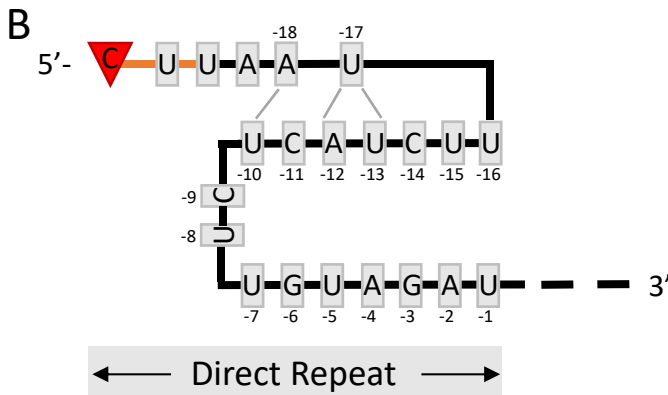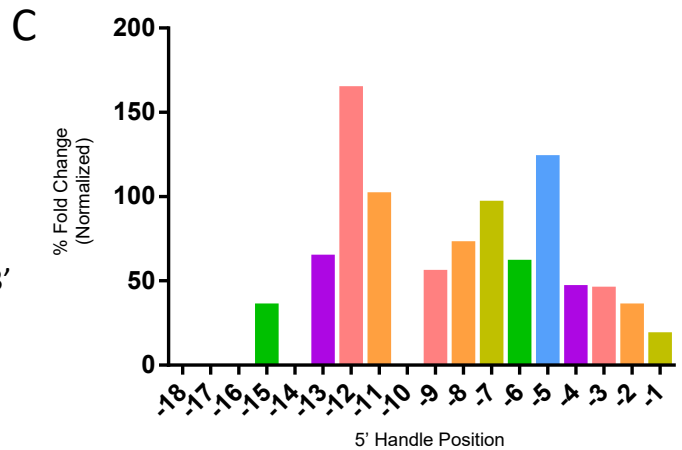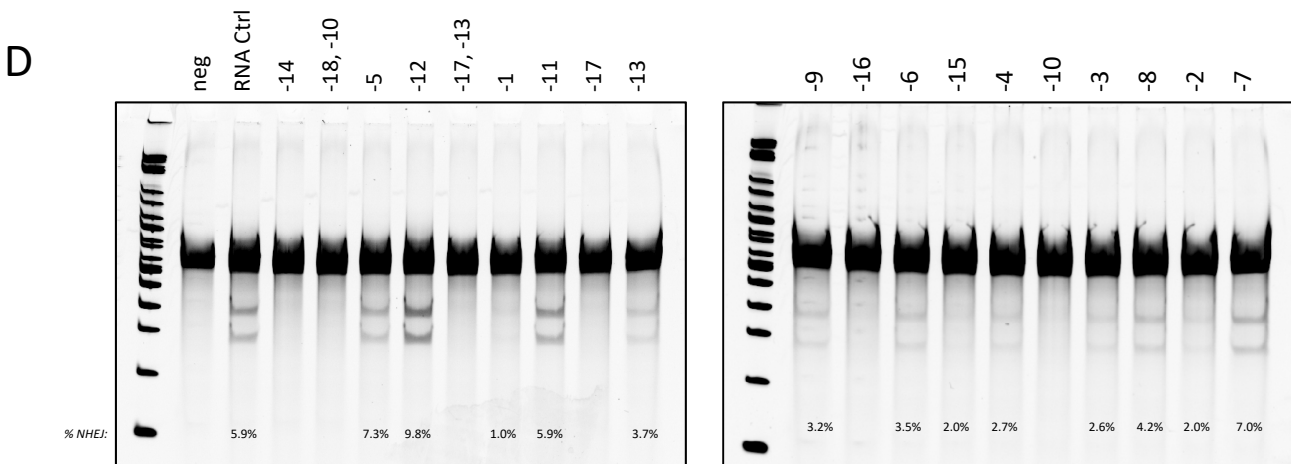

**Supplementary Figure S3.** 2'-F and cET substitution walk in direct repeat. Complete sequence and activity of 40-mer scrRNAs targeting DNMT1 containing single 2'-F and cET substitutions in the direct repeat. No data (nd) was observed for MPF-40-09.

## Supplementary Figure S4

| Target | crRNA sequence (5' to 3')                |
|--------|------------------------------------------|
| C5     | CUUAAUUUCUACUCUUGUAGAUUACUCCAGACCAGUCAGG |
| EMX1   | CUUAAUUUCUACUCUUGUAGAUUGGUUGCCCACCCUAGUC |
| GRIN2B | CUUAAUUUCUACUCUUGUAGAUGUGCUCAAUGAAAGGAGA |
| TTR    | CUUAAUUUCUACUCUUGUAGAUUGUCUGAGGCUGGCCCUA |
| LDLR   | CUUAAUUUCUACUCUUGUAGAUCAGCUAGGACACAGCAGG |

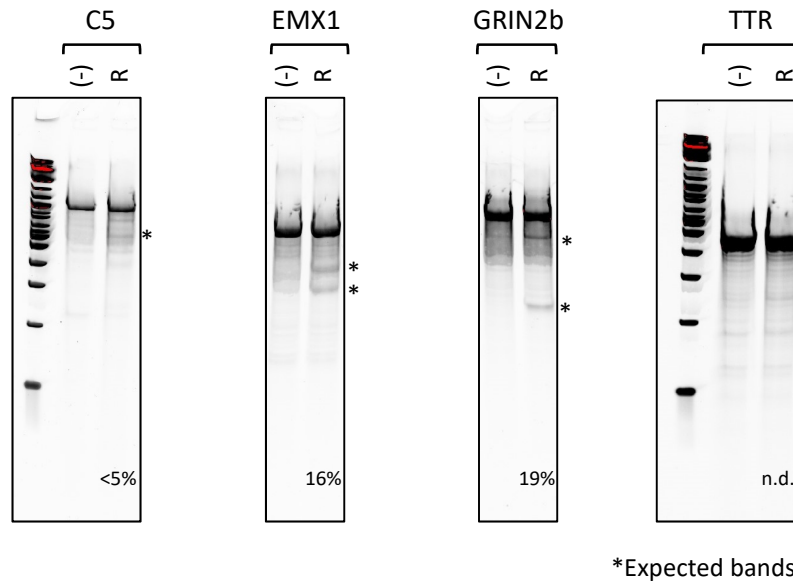

C5: Complement C5  
 EMX1: Empty Spiracles Homeobox 1  
 GRIN2b: Glutamate Ionotropic Receptor NMDA Type Subunit 2B  
 LDLR: Low Density Lipoprotein Receptor  
 TTR: Transthyretin

**Supplementary Figure S4.** Variable activity of crRNAs targeting additional genes. (Top) crRNA target sequences to indicated genes (C5, EMX1, GRIN2b, TTR, and LDLR). (Middle) Representative surveyor nuclease assay gel with % gene disruption indicated at the bottom where n.d.=no data and expected bands marked with an asterisk (\*).

# Supplementary Figure S5

A

| Name             | crRNA sequence (5' to 3')                                                                         | % Gene Disruption (Absolute) |
|------------------|---------------------------------------------------------------------------------------------------|------------------------------|
| U-40-02          | CUUAAUUUCUACUCUUGUAGAU CAGCUAGGACACAGCAGG                                                         | 26                           |
| LDLR- <u>RDP</u> | C <sub>5</sub> U <sub>5</sub> UAAUUUCUACUCUUGUAGAU CAGCUAGGACACAGCA <sub>5</sub> G <sub>5</sub> G | 4                            |
| LDLR- <u>RP</u>  | C <sub>5</sub> U <sub>5</sub> UAAUUUCUACUCUUGUAGAU CAGCUAGGACACAGCA <sub>5</sub> G <sub>5</sub> G | 18                           |
| LDLR- <u>RFP</u> | C <sub>5</sub> U <sub>5</sub> UAAUUUCUACUCUUGUAGAU CAGCUAGGACACAGCA <sub>5</sub> G <sub>5</sub> G | 18                           |

← Direct Repeat →
← DNA Specificity →
2'-OMe, PS, 2'-F, DNA

B

| Name      | crRNA sequence (5' to 3')                                                                              | Fold Change (Normalized) |
|-----------|--------------------------------------------------------------------------------------------------------|--------------------------|
| U-40-02   | CUUAAUUUCUACUCUUGUAGAU CAGCUAGGACACAGCAGG                                                              | 1.0                      |
| MPD-40-01 | C <sub>5</sub> U <sub>5</sub> UAAUUUCUACUCUUGUAGAU CAGCUAGGACACAGCA <sub>5</sub> G <sub>5</sub> G      | n.d.                     |
| D-43-09   | UAAUUUCUACUCUUGUAGAU CAGCUAGGACACAGCAGG TCGTG                                                          | 1.2                      |
| D-43-10   | UAAUUUCUACUCUUGUAGAU CAGCUAGGACACAGCAGG TCGTG                                                          | 1.0                      |
| MPD-43-01 | U <sub>5</sub> A <sub>5</sub> AUUUCUACUCUUGUAGAU CAGCUAGGACACAGCAGGUCG <sub>5</sub> U <sub>5</sub> G   | 1.2                      |
| MPD-43-02 | U <sub>5</sub> A <sub>5</sub> AUUUCUACUCUUGUAGAU CAGCUAGGACACAGCAGGTCG <sub>5</sub> U <sub>5</sub> G   | 1.1                      |
| D-45-02   | CTUAAUUUCUACUCUUGUAGAU CAGCUAGGACACAGCAGG TCGTG                                                        | 1.2                      |
| D-45-03   | CTUAAUUUCUACUCUUGUAGAU CAGCUAGGACACAGCAGG TCGTG                                                        | 1.0                      |
| MPD-45-01 | C <sub>5</sub> U <sub>5</sub> UAAUUUCUACUCUUGUAGAU CAGCUAGGACACAGCAGGTCG <sub>5</sub> U <sub>5</sub> G | 1.1                      |
| MPD-45-02 | C <sub>5</sub> U <sub>5</sub> UAAUUUCUACUCUUGUAGAU CAGCUAGGACACAGCAGGTCG <sub>5</sub> U <sub>5</sub> G | 1.2                      |

← Direct Repeat →
← DNA Specificity →
2'-OMe, PS, DNA

C

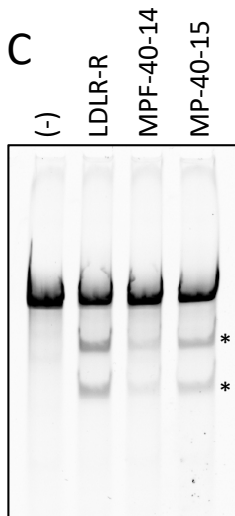

D

| Name      | crRNA sequence (5' to 3')                                                                                                                                               | Fold Change (Normalized) |
|-----------|-------------------------------------------------------------------------------------------------------------------------------------------------------------------------|--------------------------|
| U-40-02   | CUUAAUUUCUACUCUUGUAGAU CAGCUAGGACACAGCAGG                                                                                                                               | 1.0                      |
| MPF-40-14 | C <sub>5</sub> U <sub>5</sub> UAAUUUCUACUCUUGUAGAU CAGCUAG <sub>5</sub> GA <sub>5</sub> CA <sub>5</sub> CA <sub>5</sub> GC <sub>5</sub> A <sub>5</sub> G <sub>5</sub> G | 0.1                      |
| MPF-40-15 | C <sub>5</sub> U <sub>5</sub> UAAUUUCUACUCUUGUAGAU CAGCUAG <sub>5</sub> GA <sub>5</sub> CA <sub>5</sub> CA <sub>5</sub> GC <sub>5</sub> A <sub>5</sub> G <sub>5</sub> G | 0.6                      |

← Direct Repeat →
← DNA Specificity →
2'-OMe, PS, 2'-F, cET

**Supplementary Figure S5.** Gene disruption activity of scrRNAs targeting LDLR. (A) Absolute gene disruption activity of LDLR scrRNAs with nucleotide substitutions at positions 1, 8 and 9 in the DNA specificity region. (B) Single experiment demonstrating LDLR scrRNAs with DNA substitutions and truncations/extensions of both the DNA specificity region and direct repeat. (C) Surveyor nuclease assay gel with expected bands indicated by an asterisk (\*). (D) Complete sequence and activity of 40-mer scrRNAs targeting LDLR.

## Supplementary Figure S6

A

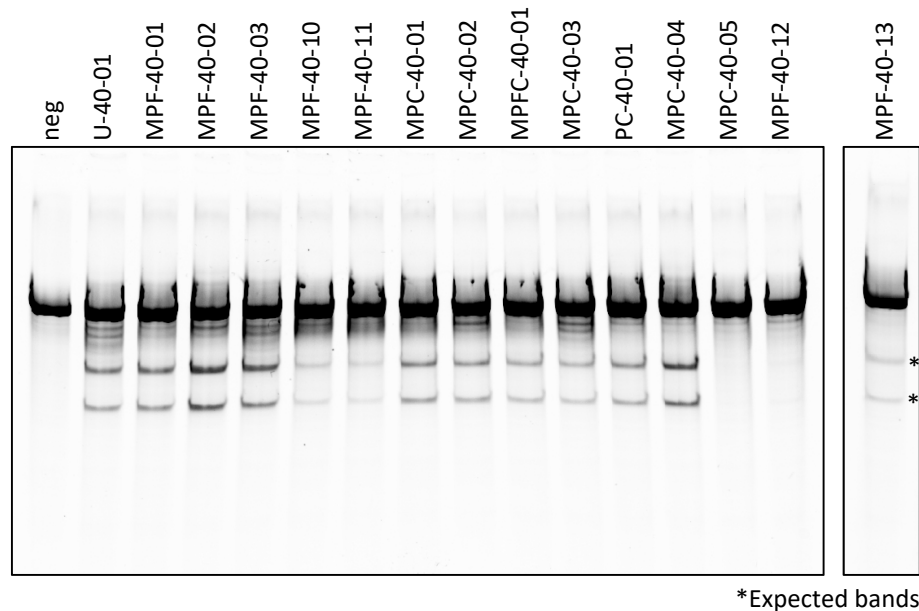

B

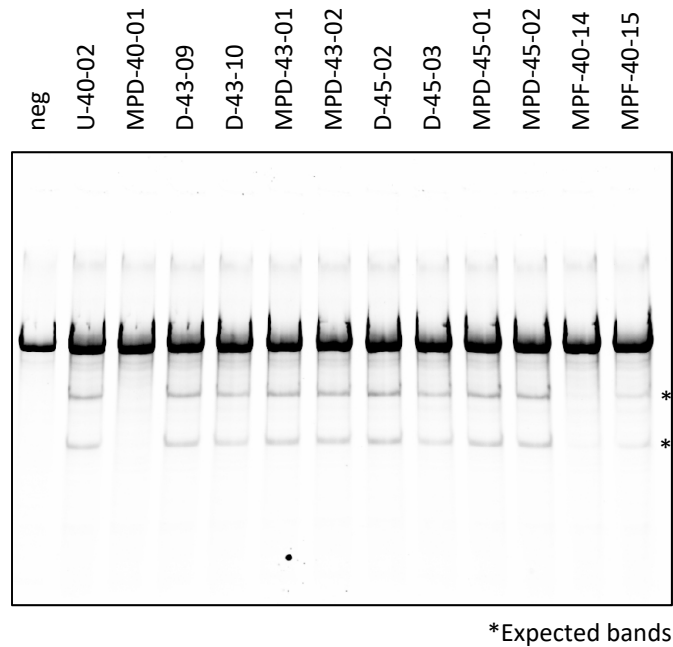

**Supplementary Figure S6.** Gene disruption activity of scrRNAs targeting DNMT1 and LDLR. (A) Surveyor nuclease assay gel with expected bands indicated by an asterisk (\*) for DNMT1 scrRNAs (indicated at the top of the gel) and sequence/chemical modifications and activity in Figure 4A. (B) Same as in (A) except scrRNAs targeting LDLR with sequence/chemical modifications and activity of LDLR scrRNAs indicated in Supplementary Figure S5.

## Supplementary Figure S7

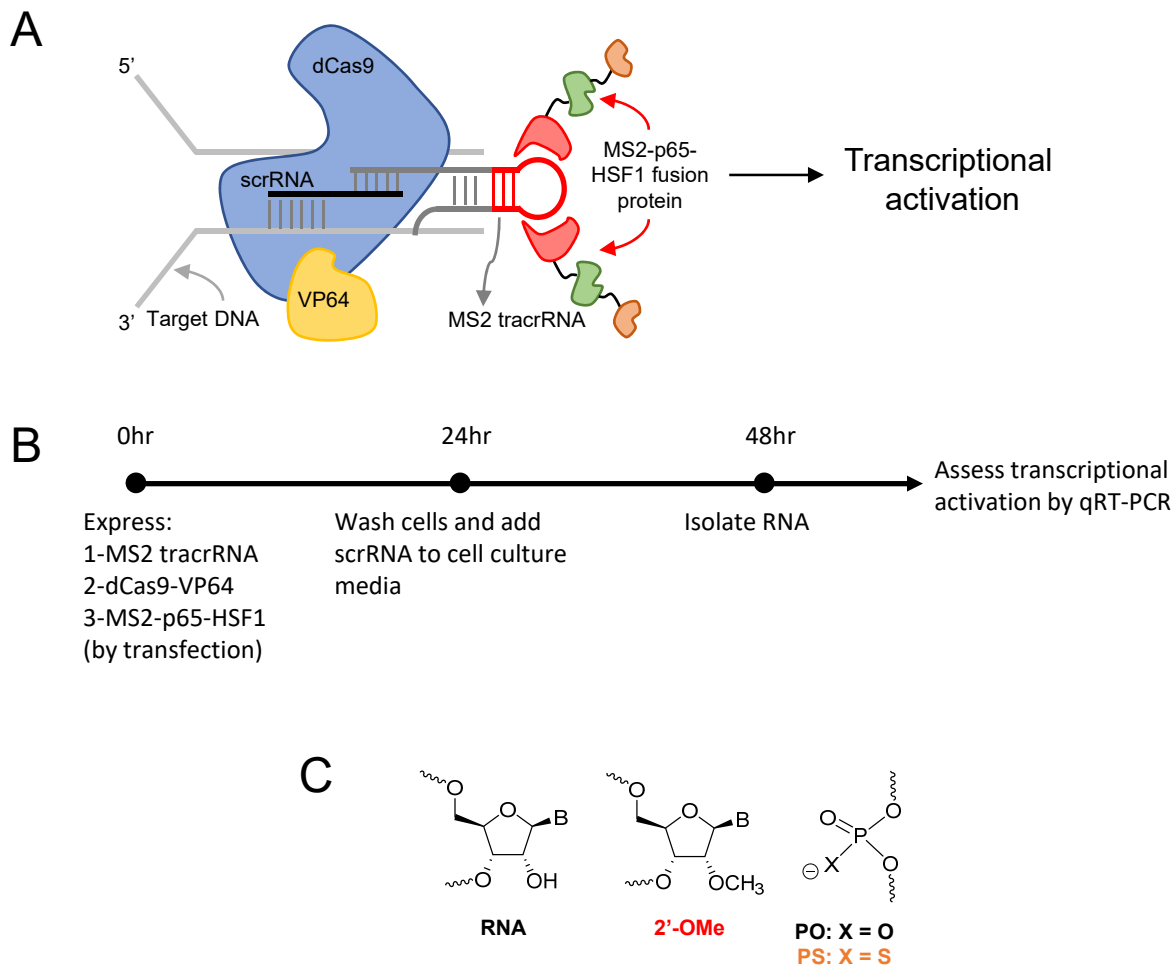

*scrRNA*: 5'-G<sub>s</sub>A<sub>s</sub>C<sub>s</sub>A<sub>s</sub>A<sub>s</sub>G<sub>s</sub>G<sub>s</sub>U<sub>s</sub>U<sub>s</sub>C<sub>s</sub>A<sub>s</sub>U<sub>s</sub>A<sub>s</sub>U<sub>s</sub>U<sub>s</sub>G<sub>s</sub>U<sub>s</sub>A<sub>s</sub>U<sub>s</sub>G<sub>s</sub>U<sub>s</sub>U<sub>s</sub>U<sub>s</sub>A<sub>s</sub>G<sub>s</sub>A<sub>s</sub>G<sub>s</sub>C<sub>s</sub>U<sub>s</sub>A<sub>s</sub>U<sub>s</sub>G<sub>s</sub>C<sub>s</sub>U<sub>s</sub>G<sub>s</sub>U<sub>s</sub>U<sub>s</sub>U<sub>s</sub>G<sub>s</sub>-3'

**Supplementary Figure S7.** A dual RNA system for gene induction using chemically modified synthetic CRISPR RNA. (A) Schematic illustration of DNA target recognition by CRISPR-Cas transcriptional activation complex. The fusion protein of nuclease dead Cas9 (dCas9, blue) and VP64 (yellow) assembles on target DNA (light gray line), specified by synthetic CRISPR RNA (scrRNA, black line). The MS2-tracrRNA (dark gray, red) complexes with scrRNA and recruits the MS2-p65-HSF1 fusion protein (red, green, orange) to induce transcriptional activation. (B) Schematic outlines experimental design for assessing TTR specific transcriptional activation. (C) Structure and sequence of modified nucleotides incorporated into TTR specific scrRNA where red indicates 2'-OMe and orange is phosphorothioate substitution.



# Supplementary Figure S8

## gBlock gene fragment sequences

| Name        | Sequence                                                                                                                                                                                                                                                                                                                                                      |
|-------------|---------------------------------------------------------------------------------------------------------------------------------------------------------------------------------------------------------------------------------------------------------------------------------------------------------------------------------------------------------------|
| FL-43-01    | <u>AAGGTCGGGCAGGAAGAGGGCCTATTTCCCATGATTCTTCATATTTGCATATACGATACAAGGCTGTTAGAGAGATAATTAGAATTAATTTGACTG</u><br>TAAACACAAAGATATTAGTACAAAATACGTGACGTAGAAAAGTAATAATTTCTGGGTAGTTTGCAGTTTTAAAATTATGTTTTAAAATGGACTATCA<br>TATGCTTACCGTAACTTGAAAGTATTTTCGATTTCTGGCTTTATATATCTTGTGGAAAGGACGAAACACCCG <b>taatttctactctttagat</b> <u>CTGATGGTCCAT</u><br><u>GTCTGTTACTC</u> |
| Trunc-42-01 | <u>AAGGTCGGGCAGGAAGAGGGCCTATTTCCCATGATTCTTCATATTTGCATATACGATACAAGGCTGTTAGAGAGATAATTAGAATTAATTTGACTG</u><br>TAAACACAAAGATATTAGTACAAAATACGTGACGTAGAAAAGTAATAATTTCTGGGTAGTTTGCAGTTTTAAAATTATGTTTTAAAATGGACTATCA<br>TATGCTTACCGTAACTTGAAAGTATTTTCGATTTCTGGCTTTATATATCTTGTGGAAAGGACGAAACACCCG <b>taatttctactctttagat</b> <u>CTGATGGTCCAT</u><br><u>GTCTGTTACTC</u> |
| Trunc-41-01 | <u>AAGGTCGGGCAGGAAGAGGGCCTATTTCCCATGATTCTTCATATTTGCATATACGATACAAGGCTGTTAGAGAGATAATTAGAATTAATTTGACTG</u><br>TAAACACAAAGATATTAGTACAAAATACGTGACGTAGAAAAGTAATAATTTCTGGGTAGTTTGCAGTTTTAAAATTATGTTTTAAAATGGACTATCA<br>TATGCTTACCGTAACTTGAAAGTATTTTCGATTTCTGGCTTTATATATCTTGTGGAAAGGACGAAACACCCG <b>taatttctactctttagat</b> <u>CTGATGGTCCATG</u><br><u>TCTGTTACTC</u> |
| Trunc-40-01 | <u>AAGGTCGGGCAGGAAGAGGGCCTATTTCCCATGATTCTTCATATTTGCATATACGATACAAGGCTGTTAGAGAGATAATTAGAATTAATTTGACTG</u><br>TAAACACAAAGATATTAGTACAAAATACGTGACGTAGAAAAGTAATAATTTCTGGGTAGTTTGCAGTTTTAAAATTATGTTTTAAAATGGACTATCA<br>TATGCTTACCGTAACTTGAAAGTATTTTCGATTTCTGGCTTTATATATCTTGTGGAAAGGACGAAACACCCG <b>tttctactctttagat</b> <u>CTGATGGTCCATGT</u><br><u>CTGTTACTC</u>    |
| Trunc-38-01 | <u>AAGGTCGGGCAGGAAGAGGGCCTATTTCCCATGATTCTTCATATTTGCATATACGATACAAGGCTGTTAGAGAGATAATTAGAATTAATTTGACTG</u><br>TAAACACAAAGATATTAGTACAAAATACGTGACGTAGAAAAGTAATAATTTCTGGGTAGTTTGCAGTTTTAAAATTATGTTTTAAAATGGACTATCA<br>TATGCTTACCGTAACTTGAAAGTATTTTCGATTTCTGGCTTTATATATCTTGTGGAAAGGACGAAACACCCG <b>taatttctactctttagat</b> <u>CTGATGGTCCAT</u><br><u>GTCTGT</u>      |
| Trunc-37-01 | <u>AAGGTCGGGCAGGAAGAGGGCCTATTTCCCATGATTCTTCATATTTGCATATACGATACAAGGCTGTTAGAGAGATAATTAGAATTAATTTGACTG</u><br>TAAACACAAAGATATTAGTACAAAATACGTGACGTAGAAAAGTAATAATTTCTGGGTAGTTTGCAGTTTTAAAATTATGTTTTAAAATGGACTATCA<br>TATGCTTACCGTAACTTGAAAGTATTTTCGATTTCTGGCTTTATATATCTTGTGGAAAGGACGAAACACCCG <b>taatttctactctttagat</b> <u>CTGATGGTCCAT</u><br><u>GTCTGT</u>      |
| Trunc-36-01 | <u>AAGGTCGGGCAGGAAGAGGGCCTATTTCCCATGATTCTTCATATTTGCATATACGATACAAGGCTGTTAGAGAGATAATTAGAATTAATTTGACTG</u><br>TAAACACAAAGATATTAGTACAAAATACGTGACGTAGAAAAGTAATAATTTCTGGGTAGTTTGCAGTTTTAAAATTATGTTTTAAAATGGACTATCA<br>TATGCTTACCGTAACTTGAAAGTATTTTCGATTTCTGGCTTTATATATCTTGTGGAAAGGACGAAACACCCG <b>taatttctactctttagat</b> <u>CTGATGGTCCATG</u><br><u>ICTGT</u>      |
| Trunc-35-01 | <u>AAGGTCGGGCAGGAAGAGGGCCTATTTCCCATGATTCTTCATATTTGCATATACGATACAAGGCTGTTAGAGAGATAATTAGAATTAATTTGACTG</u><br>TAAACACAAAGATATTAGTACAAAATACGTGACGTAGAAAAGTAATAATTTCTGGGTAGTTTGCAGTTTTAAAATTATGTTTTAAAATGGACTATCA<br>TATGCTTACCGTAACTTGAAAGTATTTTCGATTTCTGGCTTTATATATCTTGTGGAAAGGACGAAACACCCG <b>tttctactctttagat</b> <u>CTGATGGTCCATGT</u><br><u>CTGT</u>         |
| Trunc-39-01 | <u>AAGGTCGGGCAGGAAGAGGGCCTATTTCCCATGATTCTTCATATTTGCATATACGATACAAGGCTGTTAGAGAGATAATTAGAATTAATTTGACTG</u><br>GTA AACACAAAGATATTAGTACAAAATACGTGACGTAGAAAAGTAATAATTTCTGGGTAGTTTGCAGTTTTAAAATTATGTTTTAAAATGGACTATC<br>ATATGCTTACCGTAACTTGAAAGTATTTTCGATTTCTGGCTTTATATATCTTGTGGAAAGGACGAAACACCCG <b>tttctactctttagat</b> <u>CTGATGGTCCATGT</u><br><u>CTGTTACTC</u>  |
| Trunc-40-02 | <u>AAGGTCGGGCAGGAAGAGGGCCTATTTCCCATGATTCTTCATATTTGCATATACGATACAAGGCTGTTAGAGAGATAATTAGAATTAATTTGACTG</u><br>GTA AACACAAAGATATTAGTACAAAATACGTGACGTAGAAAAGTAATAATTTCTGGGTAGTTTGCAGTTTTAAAATTATGTTTTAAAATGGACTATC<br>ATATGCTTACCGTAACTTGAAAGTATTTTCGATTTCTGGCTTTATATATCTTGTGGAAAGGACGAAACACCCG <b>taatttctactctttagat</b> <u>CTGATGGTCCA</u><br><u>TGTCTGTTA</u>  |
| Trunc-34-01 | <u>AAGGTCGGGCAGGAAGAGGGCCTATTTCCCATGATTCTTCATATTTGCATATACGATACAAGGCTGTTAGAGAGATAATTAGAATTAATTTGACTG</u><br>GTA AACACAAAGATATTAGTACAAAATACGTGACGTAGAAAAGTAATAATTTCTGGGTAGTTTGCAGTTTTAAAATTATGTTTTAAAATGGACTATC<br>ATATGCTTACCGTAACTTGAAAGTATTTTCGATTTCTGGCTTTATATATCTTGTGGAAAGGACGAAACACCCG <b>tttctactctttagat</b> <u>CTGATGGTCCATGT</u><br><u>CTGT</u>       |
| Trunc-38-01 | <u>AAGGTCGGGCAGGAAGAGGGCCTATTTCCCATGATTCTTCATATTTGCATATACGATACAAGGCTGTTAGAGAGATAATTAGAATTAATTTGACTG</u><br>GTA AACACAAAGATATTAGTACAAAATACGTGACGTAGAAAAGTAATAATTTCTGGGTAGTTTGCAGTTTTAAAATTATGTTTTAAAATGGACTATC<br>ATATGCTTACCGTAACTTGAAAGTATTTTCGATTTCTGGCTTTATATATCTTGTGGAAAGGACGAAACACCCG <b>taatttctactctttagat</b> <u>CTGATGGTCCA</u><br><u>TGTCTGT</u>    |
| Trunc-36-02 | <u>AAGGTCGGGCAGGAAGAGGGCCTATTTCCCATGATTCTTCATATTTGCATATACGATACAAGGCTGTTAGAGAGATAATTAGAATTAATTTGACTG</u><br>GTA AACACAAAGATATTAGTACAAAATACGTGACGTAGAAAAGTAATAATTTCTGGGTAGTTTGCAGTTTTAAAATTATGTTTTAAAATGGACTATC<br>ATATGCTTACCGTAACTTGAAAGTATTTTCGATTTCTGGCTTTATATATCTTGTGGAAAGGACGAAACACCCG <b>tttctactctttagat</b> <u>CTGATGGTCCATGT</u><br><u>CTGTTA</u>     |

**Bold:** Direct Repeat  
Underlined: Primer binding sequence

**Supplementary Figure S8.** gBlock gene fragment sequences. Complete sequence of double stranded DNA fragments that were cloned into PCR4 blunt topo. Underlined sequences represent forward and reverse primer binding sites and bold sequence represents direct repeat.

## Supplementary Figure S9

| Target | Forward primer (5' to 3') | Reverse primer (5' to 3') | Ta | Expected Products |
|--------|---------------------------|---------------------------|----|-------------------|
| C5     | catgggtaaccagcaaac        | ggaataagtgatggggcagg      | 67 | 729, 258, 471     |
| EMX1   | ccatccccttctgtgaatgt      | ggagattggagacacggaga      | 65 | 639, 363, 276     |
| GRIN2B | gcatactcgcatggctacct      | ctccctgcagcccctttta       | 68 | 760, 555, 205     |
| LDLR   | ggagacccaatacaacaatc      | ctagactccgtctcaagaag      | 62 | 653, 403, 250     |
| TTR    | cagaatcagcaggtttgcag      | caaacctaatgcaccaaagc      | 63 | 418, 246, 172     |

**Supplementary Figure S9.** Primer sequences for additional target genes. Forward and reverse primer sequences used for PCR amplification of target gene following transfection with scrRNAs as in Supplementary Figure S5. Actual expected product sizes are indicated (top, right) and marked with an asterisk (\*) in Supplementary Figure S5.
